# Supplementary material for: Integration of Culture-Based and Molecular Analysis of a Complex Sponge-Associated Bacterial Community
Source: PubMed Central journal article supplement (PMC3949686; doi:10.1371/journal.pone.0090517), 2014-03-11
Supplement: pone.0090517.s002.pdf [file pone.0090517.s002.pdf]

| Isolate                    | Closest Relative                             | Acc. No. | % Identity | SpongeID | Isolation Medium |
|----------------------------|----------------------------------------------|----------|------------|----------|------------------|
| <b>Actinomycetes</b>       |                                              |          |            |          |                  |
| XT125-F                    | <i>Arthrobacter</i> sp. M1 5-4               | AY762057 | 100        | Xt01     | GA+abx           |
| XT129                      | <i>Arthrobacter crystallopoietes</i>         | HM163531 | 99         | Xt01     | GA+abx           |
| XT130                      | <i>Arthrobacter</i> sp. MH-129               | AM423148 | 98         | Xt01     | GA+abx           |
| XT223                      | <i>Arthrobacter</i> sp. 8A18S61              | HQ246230 | 100        | Xt02     | GA+abx           |
| XT111                      | <i>Arthrobacter</i> sp. 8A18S61              | HQ246230 | 100        | Xt01     | R2AV+abx         |
| XT127                      | <i>Brevibacterium</i> sp. SC9                | EU099382 | 99         | Xt01     | GA+abx           |
| XT132-F                    | <i>Brevibacterium iodinum</i>                | FJ652620 | 99         | Xt01     | GA+abx           |
| XT212                      | <i>Brevibacterium iodinum</i>                | FJ652620 | 99         | Xt02     | GA+abx           |
| XT218                      | <i>Brevibacterium iodinum</i>                | FJ652620 | 99         | Xt02     | GA+abx           |
| XT126                      | <i>Microbacterium esteraromaticum</i>        | FJ527721 | 99         | Xt01     | GA+abx           |
| XT128-F                    | <i>Microbacterium</i> sp. JL1103             | DQ985063 | 99         | Xt01     | GA+abx           |
| XT342                      | <i>Microbacterium</i> sp. JJD-1              | FJ765512 | 99         | Xt03     | GA+abx           |
| XT325                      | <i>Microbacterium</i> sp. TSWCW21            | GQ284466 | 99         | Xt03     | R2AV+abx         |
| XT327                      | <i>Microbacterium</i> sp. TSWCW21            | GQ284466 | 99         | Xt03     | R2AV+abx         |
| XT339                      | <i>Microbacterium</i> sp. TSWCW21            | GQ284466 | 99         | Xt03     | R2AV+abx         |
| XT216                      | <i>Micrococcus</i> sp. MG-2010-D12           | FR750272 | 99         | Xt02     | GA+abx           |
| XT226                      | <i>Micrococcus</i> sp. PA-E028               | FJ233852 | 99         | Xt02     | GA+abx           |
| XT320                      | <i>Micrococcus</i> sp. ITCr08                | FR823400 | 99         | Xt03     | R2AV+abx         |
| XT104                      | <i>Verrucosisspora</i> sp. A1                | EU714241 | 99         | Xt01     | R2AV+abx         |
| XT110                      | <i>Micromonospora</i> sp. 16                 | FJ205721 | 98         | Xt01     | R2AV+abx         |
| XT133-F                    | <i>Micromonospora</i> sp. 206203             | EU437824 | 99         | Xt01     | R2AV+abx         |
| XT207                      | <i>Micromonospora</i> sp. R1                 | EU714258 | 99         | Xt02     | R2AV+abx         |
| XT301                      | <i>Rhodococcus equi</i> 103S                 | FN563149 | 99         | Xt03     | GA+abx           |
| XT321                      | <i>Rhodococcus erythropolis</i>              | DQ518913 | 99         | Xt03     | R2AV+abx         |
| XT203-F                    | <i>Streptomyces chromofuscus</i>             | FJ486284 | 99         | Xt02     | R2AV+abx         |
| <b>Firmicutes</b>          |                                              |          |            |          |                  |
| XT112                      | <i>Aneurinibacillus migulanus</i>            | AB112723 | 99         | Xt01     | R2AV+abx         |
| XT124                      | <i>Bacillus licheniformis</i>                | EU071553 | 99         | Xt01     | GA+abx           |
| XT225                      | <i>Bacillus altitudinis</i>                  | JF508373 | 99         | Xt02     | GA+abx           |
| XT230                      | <i>Bacillus subtilis</i>                     | FR846526 | 99         | Xt02     | GA+abx           |
| XT333-F                    | <i>Bacillus licheniformis</i>                | FJ493045 | 99         | Xt03     | GA+abx           |
| XT316                      | <i>Bacillus</i> sp. 210_50                   | GQ199752 | 99         | Xt03     | MA2216           |
| XT100                      | <i>Bacillus altitudinis</i>                  | JF508373 | 100        | Xt01     | R2AV+abx         |
| XT324                      | <i>Bacillus</i> sp. R-11590                  | AJ438301 | 99         | Xt03     | R2AV+abx         |
| XT328                      | <i>Bacillus licheniformis</i>                | GQ375242 | 99         | Xt03     | R2AV+abx         |
| XT336                      | <i>Bacillus licheniformis</i>                | GQ375242 | 99         | Xt03     | R2AV+abx         |
| XT208                      | <i>Bacterium DC36(2011)</i>                  | HQ178963 | 99         | Xt02     | R2AV+abx         |
| XT222                      | <i>Bacterium DC36(2011)</i>                  | HQ178963 | 99         | Xt02     | R2AV+abx         |
| XT123                      | <i>Staphylococcus pasteurii</i>              | FJ613579 | 99         | Xt01     | GA+abx           |
| XT306                      | <i>Staphylococcus equorum</i>                | HQ202869 | 99         | Xt03     | GA+abx           |
| XT341                      | <i>Staphylococcus epidermidis</i>            | AB617572 | 99         | Xt03     | GA+abx           |
| XT323                      | <i>Staphylococcus</i> sp. SB10-23            | GU595329 | 100        | Xt03     | R2AV+abx         |
| XT326                      | <i>Staphylococcus equorum</i>                | HQ202869 | 99         | Xt03     | R2AV+abx         |
| XT337                      | <i>Staphylococcus equorum</i> subsp. equorum | FR691468 | 99         | Xt03     | R2AV+abx         |
| <b>Alphaproteobacteria</b> |                                              |          |            |          |                  |
| XT322                      | <i>Lutibacterium anuloeferans</i>            | EU440968 | 99         | Xt03     | R2AV+abx         |
| XT122                      | <i>Alphaproteobacterium M07</i>              | DQ399724 | 99         | Xt01     | GA+abx           |
| XT335                      | <i>Alphaproteobacterium JE041</i>            | DQ097262 | 100        | Xt03     | GA+abx           |
| XT107                      | <i>Bacterium</i> 1H203                       | JF411464 | 97         | Xt01     | R2AV+abx         |
| <b>Gammaproteobacteria</b> |                                              |          |            |          |                  |
| XT102                      | <i>Spongiobacter nickelotolerans</i>         | AB205011 | 93         | Xt01     | MA2216           |
| XT205                      | <i>Gammaproteobacterium MOLA 531</i>         | AM990755 | 91         | Xt02     | MA2216           |
| XT315                      | <i>Vibrio harveyi</i>                        | HM236045 | 99         | Xt03     | MA2216           |

Table S2. Cultured isolates from *Xestospongia testudinaria*.
