# Supplementary material for: Integration of Culture-Based and Molecular Analysis of a Complex Sponge-Associated Bacterial Community
Source: PubMed Central journal article supplement (PMC3949686; doi:10.1371/journal.pone.0090517), 2014-03-11
Supplement: pone.0090517.s003.pdf [file pone.0090517.s003.pdf]

| Classification            | OTU | Number of Sequences |  | Classification    | OTU | Number of Sequences |
|---------------------------|-----|---------------------|--|-------------------|-----|---------------------|
| O JTB23 Proteobacteria*   | 97  | 204                 |  | O Nitrospina*     | 960 | 848                 |
| Δ Gammaproteobacteria     | 737 | 22                  |  | □ Nitrospina*     | 595 | 366                 |
| O Gammaproteobacteria     | 448 | 128                 |  | O Nitrospina*     | 72  | 135                 |
| □ Gammaproteobacteria     | 306 | 26                  |  | O Acidimicrobiae* | 129 | 999                 |
| ■ Gammaproteobacteria     | 209 | 28                  |  | O Acidimicrobiae  | 924 | 12                  |
| □ Gammaproteobacteria*    | 413 | 397                 |  | □ Acidimicrobiae  | 691 | 4                   |
| □ Gammaproteobacteria*    | 654 | 36                  |  | O Acidimicrobiae* | 624 | 238                 |
| □ Alphaproteobacteria     | 629 | 84                  |  | O Acidimicrobiae  | 916 | 25                  |
| □ Alphaproteobacteria     | 644 | 26                  |  | Δ Acidimicrobiae* | 838 | 495                 |
| □ Alphaproteobacteria*    | 970 | 173                 |  | Δ Acidimicrobiae* | 835 | 170                 |
| O Alphaproteobacteria*    | 861 | 39                  |  | □ Acidimicrobiae* | 716 | 53                  |
| O Alphaproteobacteria     | 436 | 71                  |  | □ Chloroflexi*    | 874 | 970                 |
| O Alphaproteobacteria*    | 512 | 230                 |  | O Chloroflexi*    | 932 | 176                 |
| O Alphaproteobacteria     | 408 | 111                 |  | □ Chloroflexi*    | 478 | 511                 |
| Δ Deltaproteobacteria*    | 766 | 47                  |  | □ Chloroflexi     | 496 | 47                  |
| □ Deltaproteobacteria*    | 800 | 96                  |  | □ Chloroflexi     | 425 | 38                  |
| O Deltaproteobacteria*    | 673 | 484                 |  | □ Chloroflexi     | 910 | 224                 |
| O Deltaproteobacteria*    | 678 | 156                 |  | □ Chloroflexi*    | 57  | 137                 |
| □ Spirochaeta*            | 602 | 75                  |  | Δ Chloroflexi*    | 476 | 41                  |
| □ Spirochaeta*            | 802 | 61                  |  | Δ Chloroflexi     | 339 | 31                  |
| □ Spirochaeta             | 603 | 60                  |  | Δ Chloroflexi     | 668 | 25                  |
| O Gemmatimondetes         | 619 | 131                 |  | Δ Chloroflexi*    | 152 | 16                  |
| Δ Gemmatimondetes*        | 618 | 281                 |  | Δ Chloroflexi     | 260 | 33                  |
| Δ Gemmatimondetes*        | 124 | 138                 |  | □ Chloroflexi     | 9   | 40                  |
| O Acidobacteria*          | 211 | 31                  |  | □ Chloroflexi*    | 642 | 88                  |
| □ Acidobacteria*          | 758 | 97                  |  | □ Chloroflexi*    | 486 | 277                 |
| ■ Acidobacteria           | 364 | 109                 |  | O Chloroflexi*    | 416 | 74                  |
| □ Acidobacteria           | 561 | 28                  |  | Δ Chloroflexi*    | 812 | 46                  |
| O Acidobacteria           | 59  | 48                  |  | □ Chloroflexi     | 54  | 79                  |
| □ Acidobacteria*          | 883 | 89                  |  | O Chloroflexi*    | 899 | 282                 |
| □ Acidobacteria*          | 853 | 668                 |  | Δ Chloroflexi     | 394 | 101                 |
| Δ Candidate Division OD1  | 626 | 39                  |  | □ Chloroflexi*    | 881 | 311                 |
| Δ Candidate Division TM7* | 455 | 12                  |  | O Chloroflexi     | 62  | 18                  |
| □ Cyanobacteria*          | 415 | 191                 |  | Δ Chloroflexi*    | 263 | 71                  |
| □ Deinococcus-Thermus*    | 267 | 24                  |  | Δ Chloroflexi*    | 96  | 17                  |

Table S3. Classification of shared OTUs found in all four *Xestospongia* sponges.
